# Supplementary material for: The Characterization of the Key Aroma Compounds in Non-Smoked Bacon by Instrumental and Sensory Methods
Source: MDPI journal article supplement (doi:10.3390/foods13081260), 2024-04-19
Supplement: s1 [file s1]

**Table S1.** Volatile compounds in non-smoked bacon detected by GC × GC-TOFMS.

| NO. | CAS        | Compounds                 | RI   | 1 <sup>st</sup> Dt<br>(min) | 2 <sup>nd</sup> Dt (s) | Concentration (µg/kg)     |                            |                           |
|-----|------------|---------------------------|------|-----------------------------|------------------------|---------------------------|----------------------------|---------------------------|
|     |            |                           |      |                             |                        | XW                        | ZZ                         | MN                        |
|     |            | Hydrocarbons              |      |                             |                        |                           |                            |                           |
| 1   | 109-66-0   | Pentane                   | 500  | 4.10                        | 1.60                   | 560.84±43.79 <sup>b</sup> | 700.73±43.26 <sup>c</sup>  | 214.48±12.86 <sup>a</sup> |
| 2   | 592-76-7   | 1-Heptene                 | 746  | 4.90                        | 1.92                   | 13.65±0.52 <sup>a</sup>   | 72.78±5.12 <sup>b</sup>    | -                         |
| 3   | 111-65-9   | Octane                    | 791  | 5.40                        | 2.30                   | 377.27±33.67 <sup>a</sup> | 886.27±32.47 <sup>b</sup>  | -                         |
| 4   | 7642-15-1  | (Z)-4-Octene              | 846  | 6.20                        | 2.36                   | 10.54±0.46                | -                          | -                         |
| 5   | 13389-42-9 | (E)-2-Octene              | 860  | 6.40                        | 2.42                   | 5.89±0.55                 | -                          | -                         |
| 6   | 111-67-1   | 2-Octene                  | 846  | 6.20                        | 2.38                   | -                         | 55.49±4.66 <sup>b</sup>    | 32.70±2.16 <sup>a</sup>   |
| 7   | 14850-22-7 | (Z)-3-Octene              | 860  | 6.40                        | 2.42                   | -                         | 28.14±2.36                 | -                         |
| 8   | 111-84-2   | Nonane                    | 893  | 6.90                        | 2.86                   | 5.81±0.43 <sup>a</sup>    | 10.32±0.39 <sup>b</sup>    | 18.09±1.64 <sup>c</sup>   |
| 9   | 1465084    | 3-Methyl-nonane           | 962  | 8.50                        | 3.32                   | 14.80±1.56                | -                          | -                         |
| 10  | 124-18-5   | Decane                    | 1000 | 9.40                        | 3.50                   | 84.53±6.96 <sup>b</sup>   | 39.04±2.68 <sup>a</sup>    | 572.54±48.18 <sup>c</sup> |
| 11  | 872-05-9   | 1-Decene                  | 1039 | 10.70                       | 3.34                   | 39.09±3.52                | -                          | -                         |
| 12  | 56700-77-7 | (E)-1,3-nonadiene         | 1051 | 11.10                       | 2.94                   | 4.68±0.42                 | -                          | -                         |
| 13  | 1120-21-4  | Undecane                  | 1088 | 12.30                       | 4.18                   | 66.11±5.02 <sup>a</sup>   | 69.99±7.52 <sup>a</sup>    | 69.60±6.96 <sup>a</sup>   |
| 14  | 112-40-3   | Dodecane                  | 1186 | 16.30                       | 4.58                   | 141.56±8.95 <sup>a</sup>  | 126.11±10.99 <sup>a</sup>  | 233.93±10.38 <sup>b</sup> |
| 15  | 103-65-1   | Propyl-benzene            | 1199 | 16.90                       | 2.92                   | 238.26±16.92 <sup>b</sup> | 163.67±10.21 <sup>a</sup>  | 163.76±17.81 <sup>a</sup> |
| 16  | 300-57-2   | 2-Propenyl-benzene        | 1257 | 19.40                       | 2.66                   | 57.37±3.26 <sup>c</sup>   | 36.23±2.39 <sup>b</sup>    | 22.22±2.09 <sup>a</sup>   |
| 17  | 629-50-5   | Tridecane                 | 1293 | 20.90                       | 4.62                   | 76.61±6.81                | 366.68±28.3                | 54.84±4.15                |
| 18  | 3891-98-3  | 2,6,10-Trimethyl-dodecane | 1351 | 23.40                       | 4.82                   | -                         | 270.57±23.96               | -                         |
| 19  | 6418-41-3  | 3-Methyl-tridecane        | 1360 | 23.80                       | 4.68                   | 8.95±0.96 <sup>a</sup>    | -                          | 7.82±0.62 <sup>a</sup>    |
| 20  | 629-59-4   | Tetradecane               | 1393 | 25.20                       | 4.66                   | 27.24±2.72 <sup>a</sup>   | 1201.47±98.93 <sup>b</sup> | 31.91±2.47 <sup>a</sup>   |

|    |            |                        |      |       |      |                             |                             |                             |
|----|------------|------------------------|------|-------|------|-----------------------------|-----------------------------|-----------------------------|
| 21 | 41446-78-0 | (E)-4-tetradecene      | 1439 | 27.10 | 4.68 | -                           | 31.37±2.6                   | -                           |
| 22 | 4861-58-9  | 2-Pentyl-thiophene     | 1453 | 27.70 | 3.06 | 2.48±0.25                   | -                           | -                           |
| 23 | 544-76-3   | Hexadecane             | 1597 | 33.50 | 4.64 | -                           | 213.86±14.82 <sup>b</sup>   | 2.97±0.14 <sup>a</sup>      |
|    |            | SubTotal               |      |       |      | 1735.66±136.77 <sup>b</sup> | 4272.73±290.66 <sup>c</sup> | 1424.87±109.45 <sup>a</sup> |
|    |            | Aldehydes              |      |       |      |                             |                             |                             |
| 24 | 123-38-6   | Propanal               | 781  | 5.30  | 1.72 | 897.87±89.94                | -                           | -                           |
| 25 | 78-84-2    | 2-Methyl-propanal      | 806  | 5.60  | 1.80 | 10.51±0.82                  | -                           | -                           |
| 26 | 123-72-8   | Butanal                | 866  | 6.50  | 1.86 | 50.09±2.16 <sup>b</sup>     | 67.27±5.32 <sup>c</sup>     | 31.56±2.35 <sup>a</sup>     |
| 27 | 96-17-3    | 2-Methyl-butanal       | 908  | 7.20  | 2.00 | 4.94±0.27 <sup>a</sup>      | 4.1±0.22 <sup>a</sup>       | 60.82±4.76 <sup>b</sup>     |
| 28 | 590-86-3   | 3-Methyl-butanal       | 913  | 7.30  | 3.32 | 227.9±15.07 <sup>b</sup>    | 276.51±22.71 <sup>c</sup>   | 181.92±11.37 <sup>a</sup>   |
| 29 | 110-62-3   | Pentanal               | 974  | 8.80  | 2.14 | 1359.41±91.43 <sup>b</sup>  | 3756.3±247.58 <sup>c</sup>  | 935.11±78.94 <sup>a</sup>   |
| 30 | 15798-64-8 | (Z)-2-butenal          | 1035 | 10.60 | 1.94 | 15.64±1.47 <sup>a</sup>     | 20.72±1.80 <sup>b</sup>     | -                           |
| 31 | 66-25-1    | Hexanal                | 1081 | 12.10 | 2.62 | 2192.00±195.71 <sup>b</sup> | 2774.38±186.79 <sup>c</sup> | 756.13±75.48 <sup>a</sup>   |
| 32 | 497-03-0   | (E)-2-methyl-2-butenal | 1093 | 12.50 | 2.16 | -                           | 49.38±4.52                  | -                           |
| 33 | 1115-11-3  | 2-Methyl-2-butenal     | 1093 | 12.50 | 2.16 | 15.99±1.05                  | -                           | -                           |
| 34 | 1576-87-0  | (E)-2-pentenal         | 1128 | 13.90 | 2.14 | 28.25±2.59 <sup>b</sup>     | 19.29±0.54 <sup>a</sup>     | 16.56±1.00 <sup>a</sup>     |
| 35 | 623-36-9   | 2-Methyl-2-pentenal    | 1154 | 15.00 | 2.36 | 1.17±0.09                   | -                           | -                           |
| 36 | 111-71-7   | Heptanal               | 1178 | 16.00 | 2.64 | 899.25±74.20 <sup>a</sup>   | 1042.42±102.46 <sup>a</sup> | 883.00±43.92 <sup>a</sup>   |
| 37 | 6728-26-3  | (E)-2-hexenal          | 1213 | 17.50 | 2.30 | 120.01±11.05 <sup>c</sup>   | 72.36±6.14 <sup>b</sup>     | 19.82±1.42 <sup>a</sup>     |
| 38 | 6728-31-0  | (Z)-4-heptenal         | 1234 | 18.40 | 2.42 | 9.48±0.77 <sup>c</sup>      | 8.07±0.72 <sup>b</sup>      | 4.33±0.37 <sup>a</sup>      |
| 39 | 124-13-0   | Octanal                | 1285 | 20.60 | 2.68 | 728.11±67.84 <sup>b</sup>   | 416.14±14.95 <sup>a</sup>   | 337.25±24.96 <sup>a</sup>   |
| 40 | 18829-55-5 | (E)-2-heptenal         | 1320 | 22.10 | 2.42 | 308.96±23.84 <sup>c</sup>   | 261.37±13.44 <sup>b</sup>   | 204.22±21.13 <sup>a</sup>   |
| 41 | 645-62-5   | 2-Ethyl-2-hexenal      | 1329 | 22.50 | 2.64 | 3.05±0.29 <sup>a</sup>      | 13.26±0.66 <sup>b</sup>     | -                           |
| 42 | 124-19-6   | Nonanal                | 1390 | 25.10 | 2.82 | 1644.88±131.47 <sup>c</sup> | 1132.33±77.96 <sup>b</sup>  | 207.42±16.61 <sup>a</sup>   |
| 43 | 142-83-6   | (E,E)-2,4-hexadienal   | 1397 | 25.40 | 2.10 | 3.79±0.31 <sup>b</sup>      | 2.65±0.25 <sup>a</sup>      | -                           |

|    |            |                        |      |       |      |                             |                              |                             |
|----|------------|------------------------|------|-------|------|-----------------------------|------------------------------|-----------------------------|
| 44 | 2548-87-0  | (E)-2-octenal          | 1426 | 26.60 | 2.48 | 236.69±20.39 <sup>c</sup>   | 160.46±23.12 <sup>b</sup>    | 83.72±7.51 <sup>a</sup>     |
| 45 | 3268-49-3  | Methional              | 1448 | 27.50 | 2.12 | 36.61±2.39 <sup>a</sup>     | -                            | 34.37±1.80 <sup>a</sup>     |
| 46 | 98-01-1    | Furfural               | 1455 | 27.80 | 1.88 | 2.76±0.22                   | -                            | -                           |
| 47 | 4313-03-5  | (E,E)-2,4-heptadienal  | 1489 | 29.20 | 2.18 | 38.12±3.15 <sup>c</sup>     | 25.32±1.76 <sup>b</sup>      | 18.25±1.07 <sup>a</sup>     |
| 48 | 112-31-2   | Decanal                | 1494 | 29.40 | 2.82 | 13.21±1.60 <sup>a</sup>     | 18.01±1.79 <sup>b</sup>      | 28.78±1.45 <sup>c</sup>     |
| 49 | 557-48-2   | (E,Z)-2,6-nonadienal   | 1582 | 32.90 | 2.42 | 4.16±0.40 <sup>c</sup>      | 2.00±0.08 <sup>b</sup>       | 0.72±0.06 <sup>a</sup>      |
| 50 | 3913-81-3  | (E)-2-decenal          | 1642 | 35.20 | 2.56 | -                           | -                            | 12.14±1.01                  |
| 51 | 90-02-8    | 2-Hydroxy-benzaldehyde | 1672 | 36.30 | 2.08 | 2.15±0.24                   | -                            | -                           |
| 52 | 5392-40-5  | Neral                  | 1680 | 36.60 | 2.52 | 1.89±0.22 <sup>b</sup>      | 1.26±0.10 <sup>a</sup>       | -                           |
| 53 | 6750-03-4  | 2,4-Nonadienal         | 1699 | 37.30 | 2.32 | 61.97±2.63                  | -                            | -                           |
| 54 | 5910-87-2  | (E,E)-2,4-nonadienal   | 1699 | 37.30 | 2.30 | -                           | 26.77±1.57 <sup>b</sup>      | 17.31±1.13 <sup>a</sup>     |
| 55 | 2463-77-6  | 2-Undecenal            | 1750 | 39.20 | 2.60 | 11.19±0.76 <sup>c</sup>     | 8.64±0.29 <sup>b</sup>       | 3.69±0.33 <sup>a</sup>      |
| 56 | 25152-83-4 | (E,Z)-2,4-decadienal   | 1761 | 39.60 | 2.38 | -                           | -                            | 4.84±0.42                   |
| 57 | 2363-88-4  | 2,4-Decadienal         | 1809 | 41.30 | 2.28 | 34.74±2.99                  | -                            | -                           |
| 58 | 25152-84-5 | (E,E)-2,4-decadienal   | 1809 | 41.30 | 2.28 | -                           | 19.60±1.22 <sup>b</sup>      | 16.63±0.99 <sup>a</sup>     |
|    |            | SubTotal               |      |       |      | 8964.78±797.66 <sup>b</sup> | 10178.60±379.39 <sup>c</sup> | 3858.59±306.47 <sup>a</sup> |
|    |            | Alcohols               |      |       |      |                             |                              |                             |
| 59 | 75-65-0    | 2-Methyl-2-propanol    | 899  | 7.00  | 1.70 | -                           | 5.82±0.28                    | -                           |
| 60 | 64-17-5    | Ethanol                | 928  | 7.70  | 1.76 | 2563.92±164.76 <sup>a</sup> | -                            | 2330.89±296.62 <sup>a</sup> |
| 61 | 78-92-2    | 2-Butanol              | 1023 | 10.20 | 1.72 | 3.83±0.32                   | -                            | -                           |
| 62 | 71-23-8    | 1-Propanol             | 1035 | 10.60 | 1.70 | 20.66±1.63 <sup>b</sup>     | 13.62±1.05 <sup>a</sup>      | 19.31±1.37 <sup>b</sup>     |
| 63 | 78-83-1    | 2-Methyl-1-propanol    | 1104 | 12.90 | 1.82 | -                           | -                            | 11.99±0.95                  |
| 64 | 584-02-1   | 3-Pentanol             | 1118 | 13.50 | 1.84 | 10.84±0.97 <sup>a</sup>     | 12.93±1.16 <sup>b</sup>      | -                           |
| 65 | 107-18-6   | 2-Propen-1-ol          | 1123 | 13.70 | 1.64 | 2.49±0.15                   | -                            | -                           |

|    |            |                           |      |       |      |                            |                           |                             |
|----|------------|---------------------------|------|-------|------|----------------------------|---------------------------|-----------------------------|
| 66 | 107-98-2   | 1-Methoxy-2-propanol      | 1137 | 14.30 | 1.82 | -                          | -                         | 102.40±8.69                 |
| 67 | 71-36-3    | 1-Butanol                 | 1149 | 14.80 | 1.76 | -                          | 123.68±7.68               | -                           |
| 68 | 616-25-1   | 1-Penten-3-ol             | 1161 | 15.30 | 1.78 | 650.19±50.19 <sup>c</sup>  | 429.14±24.97 <sup>b</sup> | 241±19.67 <sup>a</sup>      |
| 69 | 623-37-0   | 3-Hexanol                 | 1197 | 16.80 | 1.94 | -                          | 0.98±0.07 <sup>b</sup>    | 0.69±0.08 <sup>a</sup>      |
| 70 | 123-51-3   | 3-Methyl-1-butanol        | 1208 | 17.30 | 1.82 | 73.93±7.76 <sup>c</sup>    | 12.66±1.09 <sup>a</sup>   | 53±1.44 <sup>b</sup>        |
| 71 | 71-41-0    | 1-Pentanol                | 1250 | 19.10 | 1.92 | 736.61±74.92 <sup>c</sup>  | 591.59±47.73 <sup>b</sup> | 300.81±15.77 <sup>a</sup>   |
| 72 | 589-82-2   | 3-Heptanol                | 1294 | 21.00 | 2.02 | 2.75±0.13 <sup>a</sup>     | 6.09±0.59 <sup>b</sup>    | 2.24±0.15 <sup>a</sup>      |
| 73 | 1576-95-0  | (Z)-2-penten-1-ol         | 1317 | 22.00 | 1.78 | 295.34±19.37 <sup>c</sup>  | 212.99±15.8 <sup>b</sup>  | 55.51±4.18 <sup>a</sup>     |
| 74 | 4938-52-7  | 1-Hepten-3-ol             | 1348 | 23.30 | 1.92 | 5.78±0.46 <sup>b</sup>     | 5.84±0.56 <sup>b</sup>    | 3.08±0.18 <sup>a</sup>      |
| 75 | 111-27-3   | 1-Hexanol                 | 1350 | 23.40 | 1.92 | 652.05±73.3 <sup>b</sup>   | 318.06±16.42 <sup>a</sup> | 403.63±38.32 <sup>a</sup>   |
| 76 | 544-12-7   | 3-Hexen-1-ol              | 1380 | 24.70 | 1.88 | 1.90±0.17                  | -                         | -                           |
| 77 | 589-98-0   | 3-Octanol                 | 1392 | 25.20 | 2.10 | 1.96±0.14 <sup>a</sup>     | 2.65±0.27 <sup>b</sup>    | 3.58±0.26 <sup>c</sup>      |
| 78 | 3391-86-4  | 1-Octen-3-ol              | 1448 | 27.50 | 2.02 | 2255.31±86.85 <sup>c</sup> | 430.83±28.7 <sup>a</sup>  | 1252.59±118.65 <sup>b</sup> |
| 79 | 111-70-6   | 1-Heptanol                | 1453 | 27.70 | 1.98 | 232.86±20.47 <sup>b</sup>  | 273.43±18.16 <sup>c</sup> | 73.95±3.73 <sup>a</sup>     |
| 80 | 104-76-7   | 2-Ethyl-1-hexanol         | 1487 | 29.10 | 2.02 | 38.85±1.95 <sup>b</sup>    | 789.45±74.19 <sup>c</sup> | 12.18±1.26 <sup>a</sup>     |
| 81 | 33467-76-4 | (E)-2-hepten-1-ol         | 1509 | 30.00 | 1.90 | 8.46±0.41 <sup>b</sup>     | 0.44±0.05 <sup>a</sup>    | -                           |
| 82 | 513-85-9   | 2,3-Butanediol            | 1536 | 31.10 | 1.66 | -                          | -                         | 446.07±19.18                |
| 83 | 111-87-5   | 1-Octanol                 | 1556 | 31.90 | 2.02 | 132.41±10.59 <sup>b</sup>  | 150.47±5.44 <sup>b</sup>  | 104.67±10.44 <sup>a</sup>   |
| 84 | 18409-17-1 | (E)-2-octen-1-ol          | 1612 | 34.10 | 1.96 | 117.26±8.70 <sup>b</sup>   | 155.79±11.06 <sup>c</sup> | 25.37±1.28 <sup>a</sup>     |
| 85 | 98-00-0    | 2-Furanmethanol           | 1653 | 35.60 | 1.68 | 0.46±0.02 <sup>a</sup>     | 3.45±0.20 <sup>b</sup>    | -                           |
| 86 | 143-08-8   | 1-Nonanol                 | 1658 | 35.80 | 2.10 | 0.50±0.04 <sup>a</sup>     | -                         | 1.55±0.13 <sup>b</sup>      |
| 87 | 505-10-2   | 3-(Methylthio)-1-propanol | 1715 | 37.90 | 1.82 | -                          | -                         | 2.08±0.13                   |
| 88 | 100-51-6   | Benzyl alcohol            | 1874 | 43.10 | 1.66 | 24.05±2.86 <sup>b</sup>    | 7.03±0.6 <sup>a</sup>     | 5.2±0.44 <sup>a</sup>       |
| 89 | 60-12-8    | Phenylethyl alcohol       | 1909 | 44.00 | 1.68 | 9.12±0.46 <sup>b</sup>     | 2.37±0.17 <sup>a</sup>    | 26.92±1.94 <sup>c</sup>     |

|     |            |                         |      |       |      |                             |                             |                             |
|-----|------------|-------------------------|------|-------|------|-----------------------------|-----------------------------|-----------------------------|
|     |            | SubTotal                |      |       |      | 7841.54±770.42 <sup>c</sup> | 3549.26±300.01 <sup>a</sup> | 5478.71±387.92 <sup>b</sup> |
|     | Ketones    |                         |      |       |      |                             |                             |                             |
| 90  | 78-93-3    | 2-Butanone              | 892  | 6.90  | 1.86 | 268.6±23.89                 | -                           | -                           |
| 91  | 1002-33-1  | 1,3-Octadiene           | 949  | 8.20  | 2.50 | 22.02±1.54 <sup>b</sup>     | 26.95±2.18 <sup>c</sup>     | 15.48±1.52 <sup>a</sup>     |
| 92  | 431-03-8   | 2,3-Butanedione         | 966  | 8.60  | 1.80 | 443.28±31.18 <sup>a</sup>   | -                           | 1358.91±75.03 <sup>c</sup>  |
| 93  | 589-38-8   | 3-Hexanone              | 1048 | 11.00 | 2.34 | 1±0.1                       | -                           | -                           |
| 94  | 600-14-6   | 2,3-Pentanedione        | 1054 | 11.20 | 1.98 | 455.91±52.15 <sup>a</sup>   | 395.78±41.36 <sup>a</sup>   | 484.65±41.35 <sup>a</sup>   |
| 95  | 625-33-2   | 3-Penten-2-one          | 1125 | 13.80 | 2.10 | -                           | 0.95±0.09                   | -                           |
| 96  | 106-35-4   | 3-Heptanone             | 1149 | 14.80 | 2.58 | 9.97±0.77 <sup>b</sup>      | 17.87±1.46 <sup>c</sup>     | 5.75±0.39 <sup>a</sup>      |
| 97  | 110-43-0   | 2-Heptanone             | 1178 | 16.00 | 2.56 | 603.53±54.35 <sup>b</sup>   | 508.25±30.12 <sup>a</sup>   | 685.39±34.85 <sup>b</sup>   |
| 98  | 589-63-9   | 4-Octanone              | 1220 | 17.80 | 2.80 | 0.79±0.07 <sup>a</sup>      | 1.79±0.17 <sup>b</sup>      | 0.76±0.05 <sup>a</sup>      |
| 99  | 928-68-7   | 6-Methyl-2-heptanone    | 1232 | 18.30 | 2.60 | 20.10±1.56 <sup>a</sup>     | 24.3±2.40 <sup>b</sup>      | -                           |
| 100 | 106-68-3   | 3-Octanone              | 1250 | 19.10 | 2.78 | 35.26±1.66 <sup>b</sup>     | -                           | 23.26±1.61 <sup>a</sup>     |
| 101 | 111-13-7   | 2-Octanone              | 1281 | 20.40 | 2.64 | 57.96±5.72 <sup>c</sup>     | 38.45±3.37 <sup>b</sup>     | 21.48±2.01 <sup>a</sup>     |
| 102 | 513-86-0   | Acetoin                 | 1283 | 20.50 | 1.78 | 379.27±27.03 <sup>a</sup>   | 588.16±36.53 <sup>b</sup>   | 1003.81±90.27 <sup>c</sup>  |
| 103 | 108-94-1   | Cyclohexanone           | 1290 | 20.80 | 2.52 | 0.57±0.05                   | -                           | -                           |
| 104 | 116-09-6   | 1-Hydroxy-2-propanone   | 1294 | 21.00 | 1.76 | -                           | -                           | 38.51±2.73                  |
| 105 | 4312-99-6  | 1-Octen-3-one           | 1297 | 21.10 | 2.54 | 80.39±4.57 <sup>b</sup>     | 44.89±3.72 <sup>a</sup>     | 37.82±2.88 <sup>a</sup>     |
| 106 | 585-25-1   | 2,3-Octanedione         | 1327 | 22.40 | 2.36 | 8.60±0.84 <sup>a</sup>      | 225.17±12.54 <sup>b</sup>   | 959.45±94.7 <sup>c</sup>    |
| 107 | 110-93-0   | 6-Methyl-5-hepten-2-one | 1332 | 22.60 | 2.50 | 95.14±5.42 <sup>b</sup>     | 17.27±1.33 <sup>a</sup>     | -                           |
| 108 | 821-55-6   | 2-Nonanone              | 1385 | 24.90 | 2.72 | 26.58±2.73 <sup>b</sup>     | 15.28±1.34 <sup>a</sup>     | 85.64±7.82 <sup>c</sup>     |
| 109 | 18402-82-9 | (E)-3-octen-2-one       | 1404 | 25.70 | 2.48 | 139.09±11.80                | -                           | -                           |
| 110 | 1669-44-9  | 3-Octen-2-one           | 1404 | 25.70 | 2.46 | -                           | 90.79±9.19 <sup>a</sup>     | 253.65±24.35 <sup>b</sup>   |

|     |            |                                 |      |       |      |                             |                             |                             |
|-----|------------|---------------------------------|------|-------|------|-----------------------------|-----------------------------|-----------------------------|
| 111 | 693-54-9   | 2-Decanone                      | 1492 | 29.30 | 2.78 | -                           | 8.29±0.79 <sup>a</sup>      | 7.62±0.36 <sup>a</sup>      |
| 112 | 14309-57-0 | 3-Nonen-2-one                   | 1509 | 30.00 | 2.54 | 2.19±0.14 <sup>b</sup>      | 1.75±0.20 <sup>a</sup>      | 3.06±0.23 <sup>c</sup>      |
| 113 | 38284-27-4 | 3,5-Octadien-2-one              | 1516 | 30.30 | 2.34 | 19.21±1.68                  | -                           | -                           |
| 114 | 30086-02-3 | (E,E)-3,5-octadien-2-one        | 1566 | 32.30 | 2.26 | 22.42±1.42 <sup>a</sup>     | 22.62±1.77 <sup>a</sup>     | 51.26±3.69 <sup>b</sup>     |
| 115 | 108-29-2   | Dihydro-5-methyl-2(3H)-furanone | 1604 | 33.80 | 2.04 | 8.93±0.73                   | -                           | -                           |
| 116 | 96-48-0    | Butyrolactone                   | 1623 | 34.50 | 2.00 | 175.17±11.61 <sup>a</sup>   | -                           | 221.09±22.79 <sup>b</sup>   |
| 117 | 98-86-2    | Acetophenone                    | 1645 | 35.30 | 2.22 | 10.48±0.6 <sup>b</sup>      | 15.98±1.34 <sup>c</sup>     | 8.04±0.61 <sup>a</sup>      |
| 118 | 695-06-7   | 5-Ethyl-dihydro-2(3H)-furanone  | 1699 | 37.30 | 2.14 | 197.52±11.86 <sup>c</sup>   | 71.2±7.34 <sup>a</sup>      | 173.34±11.48 <sup>b</sup>   |
| 119 | 105-21-5   | Dihydro-5-propyl-2(3H)-furanone | 1799 | 41.00 | 2.16 | 22.43±1.37 <sup>b</sup>     | -                           | 18.05±1.55 <sup>a</sup>     |
| 120 | 104-50-7   | 5-Butyl-dihydro-2(3H)-furanone  | 1919 | 44.20 | 1.88 | 44.99±3.23 <sup>b</sup>     | 38.2±1.50 <sup>a</sup>      | 46.28±1.86 <sup>b</sup>     |
| 121 | 104-61-0   | Dihydro-5-pentyl-2(3H)-furanone | 2032 | 46.30 | 1.78 | 18.84±1.53 <sup>a</sup>     | 19.4±1.92 <sup>a</sup>      | 44.97±4.08 <sup>b</sup>     |
|     |            | SubTotal                        |      |       |      | 3170.27±307.85 <sup>b</sup> | 2173.32±150.79 <sup>a</sup> | 5548.27±398.88 <sup>c</sup> |
|     | Ester      |                                 |      |       |      |                             |                             |                             |
| 122 | 79-20-9    | Acetic acid, methyl ester       | 819  | 5.80  | 1.72 | -                           | -                           | 770.1±63.54                 |
| 123 | 141-78-6   | Ethyl Acetate                   | 879  | 6.70  | 1.86 | -                           | 47.47±3.56 <sup>a</sup>     | 455.46±38.71 <sup>b</sup>   |
| 124 | 554-12-1   | Methyl propionate               | 899  | 7.00  | 1.92 | -                           | -                           | 46.18±3.03                  |
| 125 | 623-42-7   | Butanoic acid, methyl ester     | 978  | 8.90  | 2.18 | 33.68±3.18 <sup>b</sup>     | -                           | 23.25±1.04 <sup>a</sup>     |
| 126 | 556-24-1   | Methyl isovalerate              | 1014 | 9.90  | 2.30 | 14.84±1.28 <sup>a</sup>     | -                           | 81.9±5.39 <sup>b</sup>      |

|     |          |                             |      |       |      |                           |                           |                           |
|-----|----------|-----------------------------|------|-------|------|---------------------------|---------------------------|---------------------------|
| 127 | 105-54-4 | Butanoic acid, ethyl ester  | 1033 | 10.50 | 2.42 | 48.07±3.85 <sup>c</sup>   | 3.21±0.36 <sup>a</sup>    | 17.12±1.66 <sup>b</sup>   |
| 128 | 123-86-4 | Acetic acid, butyl ester    | 1069 | 11.70 | 2.38 | 10.85±0.82 <sup>b</sup>   | 9.61±0.58 <sup>a</sup>    | -                         |
| 129 | 539-82-2 | Pentanoic acid, ethyl ester | 1128 | 13.90 | 2.72 | 15.73±1.31 <sup>b</sup>   | -                         | 11.52±0.87 <sup>a</sup>   |
| 130 | 590-01-2 | Propanoic acid, butyl ester | 1135 | 14.20 | 2.74 | 5.15±0.33 <sup>a</sup>    | 6.02±0.48 <sup>b</sup>    | -                         |
| 131 | 628-63-7 | Acetic acid, pentyl ester   | 1166 | 15.50 | 2.62 | 1.82±0.14                 | -                         | -                         |
| 132 | 106-70-7 | Hexanoic acid, methyl ester | 1180 | 16.10 | 2.68 | 589.89±18.80 <sup>b</sup> | 238.80±12.71 <sup>a</sup> | 702.58±34.62 <sup>c</sup> |
| 133 | 123-66-0 | Hexanoic acid, ethyl ester  | 1227 | 18.10 | 2.90 | 236.47±15.05 <sup>c</sup> | 44.04±3.17 <sup>a</sup>   | 148.82±7.3 <sup>b</sup>   |
| 134 | 142-92-7 | Acetic acid, hexyl ester    | 1267 | 19.80 | 2.74 | 3.66±0.31                 | -                         | -                         |
| 135 | 540-18-1 | Butanoic acid, pentyl ester | 1311 | 21.70 | 3.08 | 2.13±0.19                 | -                         | -                         |
| 136 | 106-30-9 | Heptanoic acid, ethyl ester | 1330 | 22.50 | 3.00 | 4.78±0.48 <sup>c</sup>    | 0.89±0.08 <sup>a</sup>    | 3.01±0.23 <sup>b</sup>    |
| 137 | 111-11-5 | Octanoic acid, methyl ester | 1385 | 24.90 | 2.86 | 16.98±1.46 <sup>b</sup>   | -                         | 11.75±0.81 <sup>a</sup>   |
| 138 | 626-82-4 | Hexanoic acid, butyl ester  | 1409 | 25.90 | 3.20 | 0.93±0.07                 | -                         | -                         |
| 139 | 106-32-1 | Octanoic acid, ethyl ester  | 1431 | 26.80 | 3.08 | 24.82±2.48 <sup>b</sup>   | -                         | 3.56±0.32 <sup>a</sup>    |

|     |                       |                                |      |       |      |                             |                             |                            |
|-----|-----------------------|--------------------------------|------|-------|------|-----------------------------|-----------------------------|----------------------------|
| 140 | 110-42-9              | Decanoic acid,<br>methyl ester | 1592 | 33.30 | 2.98 | 2.14±0.21 <sup>a</sup>      | -                           | 3.27±0.37 <sup>b</sup>     |
| 141 | 110-38-3              | Decanoic acid, ethyl<br>ester  | 1637 | 35.00 | 3.16 | 4.72±0.34                   | -                           | -                          |
| 142 | 3050-69-9             | n-Caproic acid vinyl<br>ester  |      | 35.80 | 1.98 | -                           | -                           | 186.2±13.66                |
|     |                       | SubTotal                       |      |       |      | 1016.66±82.57 <sup>b</sup>  | 350.05±4.90 <sup>a</sup>    | 2464.73±76.56 <sup>c</sup> |
|     | Aromatic<br>compounds |                                |      |       |      |                             |                             |                            |
| 143 | 106-42-3              | p-Xylene                       | 1123 | 13.70 | 2.68 | 2108.89±147.19 <sup>c</sup> | 507.44±24.94 <sup>b</sup>   | 214.72±20.05 <sup>a</sup>  |
| 144 | 100-41-4              | Ethylbenzene                   | 1130 | 14.00 | 2.68 | 667.94±45.45 <sup>b</sup>   | 1764.59±155.68 <sup>c</sup> | 351.08±18.66 <sup>a</sup>  |
| 145 | 95-47-6               | o-Xylene                       | 1187 | 16.40 | 2.60 | 3.57±0.32 <sup>a</sup>      | 7.60±0.48 <sup>b</sup>      | -                          |
| 146 | 100-42-5              | Styrene                        | 1246 | 18.90 | 2.44 | -                           | 123.10±8.02 <sup>b</sup>    | 5.57±0.19 <sup>a</sup>     |
| 147 | 99-87-6               | p-Cymene                       | 1262 | 19.60 | 3.06 | 17.98±1.24                  | -                           | -                          |
| 148 | 496-11-7              | Indane                         | 1364 | 24.00 | 2.94 | -                           | -                           | 1.17±0.12                  |
| 149 | 100-52-7              | Benzaldehyde                   | 1516 | 30.30 | 2.16 | 566.38±61.84 <sup>c</sup>   | 438.95±20.93 <sup>b</sup>   | 175.92±12.77 <sup>a</sup>  |
| 150 | 122-78-1              | Benzeneacetaldehyde            | 1634 | 34.90 | 2.16 | 159.35±12.70 <sup>c</sup>   | 112.73±12.71 <sup>b</sup>   | 97.25±6.23 <sup>a</sup>    |
| 151 | 91-20-3               | Naphthalene                    | 1737 | 38.70 | 2.50 | -                           | 6.26±0.60                   | -                          |
| 152 | 275-51-4              | Azulene                        | 1737 | 38.70 | 2.50 | 5.11±0.36                   | -                           | -                          |
| 153 | 108-95-2              | Phenol                         | 1994 | 45.70 | 1.48 | 10.15±0.58 <sup>a</sup>     | 30.3±1.20 <sup>b</sup>      | 48.34±3.72 <sup>c</sup>    |
| 154 | 106-44-5              | p-Cresol                       | 2079 | 47.00 | 1.48 | 7.08±0.55 <sup>b</sup>      | 2.7±0.24 <sup>a</sup>       | 6.91±0.86 <sup>b</sup>     |
| 155 | 120-72-9              | Indole                         | 2458 | 51.40 | 1.58 | 1.75±0.14 <sup>a</sup>      | 6.63±0.47 <sup>b</sup>      | -                          |
|     |                       | SubTotal                       |      |       |      | 3548.21±278.7 <sup>c</sup>  | 3000.31±229.71 <sup>b</sup> | 900.96±35.00 <sup>a</sup>  |
|     | Acids                 |                                |      |       |      |                             |                             |                            |
| 156 | 64-19-7               | Acetic acid                    | 1443 | 27.30 | 1.52 | 508.20±48.26 <sup>b</sup>   | 212.20±19.48 <sup>a</sup>   | 637.14±55.08 <sup>c</sup>  |
| 157 | 79-09-4               | Propanoic acid                 | 1536 | 31.10 | 1.54 | 38.35±3.21 <sup>a</sup>     | -                           | 55.98±3.37 <sup>b</sup>    |



|     |           |                        |      |       |      |                             |                           |                             |
|-----|-----------|------------------------|------|-------|------|-----------------------------|---------------------------|-----------------------------|
| 158 | 107-92-6  | Butanoic acid          | 1623 | 34.50 | 1.58 | 465.95±37.93 <sup>c</sup>   | 36.9±2.21 <sup>a</sup>    | 123.92±12.55 <sup>b</sup>   |
| 159 | 503-74-2  | 3-Methyl-butanoic acid | 1669 | 36.20 | 1.62 | 145.47±10.49 <sup>b</sup>   | 57.06±4.15 <sup>a</sup>   | 247.47±16.72 <sup>c</sup>   |
| 160 | 109-52-4  | Pentanoic acid         | 1736 | 38.70 | 1.60 | 176.98±17.87 <sup>c</sup>   | 39.98±4.14 <sup>a</sup>   | 129.52±13.16 <sup>b</sup>   |
| 161 | 142-62-1  | Hexanoic acid          | 1845 | 42.30 | 1.62 | 981.35±102.55 <sup>b</sup>  | 357.55±11.64 <sup>a</sup> | 1656.48±164.28 <sup>c</sup> |
| 162 | 111-14-8  | Heptanoic acid         | 1959 | 45.00 | 1.52 | 45.43±3.22 <sup>b</sup>     | 16.71±1.05 <sup>a</sup>   | 41.78±2.54 <sup>b</sup>     |
| 163 | 124-07-2  | Octanoic acid          | 2066 | 46.80 | 1.50 | 139.81±16.87 <sup>c</sup>   | 35.62±1.88 <sup>a</sup>   | 78.72±4.80 <sup>b</sup>     |
| 164 | 112-05-0  | Nonanoic acid          | 2176 | 48.30 | 1.48 | 16.11±1.34 <sup>b</sup>     | 8.82±0.64 <sup>a</sup>    | 18.1±2.53 <sup>b</sup>      |
| 165 | 334-48-5  | n-Decanoic acid        | 2290 | 49.60 | 1.48 | -                           | 5.7±0.46 <sup>a</sup>     | 16.39±0.32 <sup>b</sup>     |
|     |           | SubTotal               |      |       |      | 2517.63±182.19 <sup>b</sup> | 770.55±58.62 <sup>a</sup> | 3005.49±215.8 <sup>c</sup>  |
|     |           | Furan                  |      |       |      |                             |                           |                             |
| 166 | 110-00-9  | Furan                  | 790  | 5.40  | 1.66 | 2.31±0.16 <sup>c</sup>      | 1.37±0.07 <sup>b</sup>    | 1.07±0.04 <sup>a</sup>      |
| 167 | 930-27-8  | 3-Methyl-furan         | 859  | 6.40  | 1.80 | 3.66±0.23                   | -                         | -                           |
| 168 | 534-22-5  | 2-Methyl-furan         | 859  | 6.40  | 1.80 | -                           | 3.6±0.26 <sup>b</sup>     | 2.81±0.20 <sup>a</sup>      |
| 169 | 3208-16-0 | 2-Ethyl-furan          | 945  | 8.10  | 2.04 | 41.24±3.23 <sup>c</sup>     | 20.49±1.55 <sup>a</sup>   | 31.43±2.26 <sup>b</sup>     |
| 170 | 4229-91-8 | 2-Propyl-furan         | 1027 | 10.30 | 2.32 | 4.18±0.19 <sup>a</sup>      | 3.85±0.37 <sup>a</sup>    | 5.3±0.30 <sup>b</sup>       |
| 171 | 3777-69-3 | 2-Pentyl-furan         | 1220 | 17.80 | 2.88 | 640.43±33.06 <sup>b</sup>   | 586.18±57.44 <sup>b</sup> | 202.73±17.54 <sup>a</sup>   |
| 172 | 3777-70-6 | 2-Hexyl-furan          | 1323 | 22.20 | 2.98 | 2.09±0.09                   | -                         | -                           |
| 173 | 3777-71-7 | 2-n-Heptylfuran        | 1426 | 26.60 | 3.08 | 1.32±0.12                   | -                         | -                           |
|     |           | SubTotal               |      |       |      | 695.23±67.15 <sup>b</sup>   | 615.49±25.36 <sup>b</sup> | 243.34±14.14 <sup>a</sup>   |
|     |           | Others                 |      |       |      |                             |                           |                             |
| 174 | 110-86-1  | Pyridine               | 1187 | 16.40 | 2.10 | 34.13±3.93 <sup>b</sup>     | 44.45±3.88 <sup>c</sup>   | 25.54±2.54 <sup>a</sup>     |
| 175 | 470-82-6  | Eucalyptol             | 1207 | 17.20 | 3.54 | -                           | 8.84±0.55                 | -                           |
| 176 | 290-37-9  | Pyrazine               | 1211 | 17.40 | 2.04 | 8.14±0.76 <sup>a</sup>      | 56.54±4.23 <sup>b</sup>   | -                           |
| 177 | 3581-87-1 | 2-Methyl-thiazole      | 1236 | 18.50 | 2.20 | 8.77±1.06 <sup>b</sup>      | 7.5±0.62 <sup>b</sup>     | 4.72±0.42 <sup>a</sup>      |
| 178 | 288-47-1  | Thiazole               | 1245 | 18.90 | 1.98 | 16.10±1.16 <sup>c</sup>     | 6.44±0.54 <sup>b</sup>    | 4.83±0.36 <sup>a</sup>      |

|     |            |                       |      |       |      |                               |                              |                               |
|-----|------------|-----------------------|------|-------|------|-------------------------------|------------------------------|-------------------------------|
| 179 | 109-08-0   | Methyl-pyrazine       | 1264 | 19.70 | 2.20 | -                             | 7.93±0.82 <sup>b</sup>       | 6.01±0.38 <sup>a</sup>        |
| 180 | 15679-09-1 | 2-Ethyl-thiazole      | 1301 | 21.30 | 2.38 | 5.66±0.22                     | -                            | -                             |
| 181 | 108-50-9   | 2,6-Dimethyl-pyrazine | 1327 | 22.40 | 2.36 | -                             | -                            | 19.02±1.83                    |
| 182 | 5910-89-4  | 2,3-Dimethyl-pyrazine | 1346 | 23.20 | 2.34 | -                             | -                            | 29.09±2.68                    |
| 183 | 3658-80-8  | Dimethyl trisulfide   | 1374 | 24.40 | 2.68 | -                             | -                            | 4.11±0.40                     |
| 184 | 14667-55-1 | Trimethyl-pyrazine    | 1404 | 25.70 | 2.50 | 1.63±0.10 <sup>a</sup>        | -                            | 111.01±10.77 <sup>b</sup>     |
| 185 | 1124-11-4  | Tetramethyl-pyrazine  | 1477 | 28.70 | 2.64 | 2.31±0.23                     | -                            | -                             |
| 186 | 109-97-7   | Pyrrole               | 1506 | 29.90 | 1.66 | -                             | 5.24±0.31 <sup>a</sup>       | 23.61±1.74 <sup>b</sup>       |
| 187 | 2294-76-0  | 2-Pentyl-pyridine     | 1577 | 32.70 | 2.74 | -                             | -                            | 2.19±0.16                     |
| 188 | 95-16-9    | Benzothiazole         | 1959 | 45.00 | 1.86 | 0.35±0.03 <sup>a</sup>        | -                            | 0.34±0.02 <sup>a</sup>        |
|     |            | SubTotal              |      |       |      | 77.08±8.60 <sup>a</sup>       | 136.94±12.42 <sup>b</sup>    | 230.46±13.14 <sup>c</sup>     |
|     |            | Total                 |      |       |      | 48433.69±3905.61 <sup>c</sup> | 35643.17±2021.5 <sup>a</sup> | 41027.38±2457.88 <sup>b</sup> |

1<sup>st</sup> Dt and 2<sup>nd</sup> Dt means 1<sup>st</sup> dimension time (min) and 2<sup>nd</sup> dimension time (s), respectively. “-”: Not detected; RI: Retention indices. Different letters in the same row indicate significant differences ( $P < 0.05$ ).
